# Supplementary material for: Comparison of Methods to Account for Relatedness in Genome-Wide Association Studies with Family-Based Data
Source: PLOS journal article supplement (doi:10.1371/journal.pgen.1004445), 2014-07-17
Supplement: S12 (10.1371/journal.pgen.1004445.s012) [file journal.pgen.1004445.s012]

**Table S1: Genomic control factors achieved in analysis of the real data, or a single replicate of the simulated data, when feeding externally estimated kinships into FaST-LMM**

| Kinship estimation method             | Trait analysed |                |                        |
|---------------------------------------|----------------|----------------|------------------------|
|                                       | Real           | Simulated weak | Simulated quantitative |
| Unadjusted                            | 1.23           | 1.12           | 1.43                   |
| Wrong <sup>a</sup>                    | 1.23           | 1.12           | 1.43                   |
| FLMM-R <sup>b</sup>                   | 0.99           | 0.99           | 1.00                   |
| KING (homogeneous)                    | 0.99           | 0.99           | 0.99                   |
| KING (robust)                         | 0.99           | 0.99           | 1.00                   |
| Theoretical (pedigree-based) kinships | 1.11           | 1.00           | 0.99                   |
| PLINK                                 | 1.18           | 1.12           | 1.42                   |

<sup>a</sup> Wrong = misspecified kinships, chosen to be inversely related to the theoretical kinship value.

<sup>b</sup> FLMM-R = FaST-LMM's own realised relationship matrix
